# Supplementary material
Source: Research Square preprint supplement (doi:10.21203/rs.3.rs-9228608/v1)
Supplement: Supplementary file 1 [file b04c4b1771f14bd42c727000.docx]

Supplementary Table 2. Parsimonious Model Assessing the Association Between AKI Severity and In-Hospital Mortality

| **Variable** | **Adjusted OR** | **95% CI** | **p-value** |
| --- | --- | --- | --- |
| No AKI | Reference | — | — |
| AKI (non-dialysis) | 4.82 | 4.46 – 5.21 | <0.001 |
| AKI requiring dialysis (AKI-D) | 21.1 | 18.6 – 23.8 | <0.001 |
| Age (per year) | 1.01 | 1.01 – 1.02 | <0.001 |
| Female (vs male) | 1.01 | 0.94 – 1.08 | 0.69 |

Supplementary Table 2 presents result from a survey-weighted multivariable logistic regression model evaluating the association between AKI severity and in-hospital mortality using a parsimonious set of covariates, including age and sex. This model was constructed to assess the consistency of the association under minimal adjustment. Estimates are reported as adjusted odds ratios (ORs) with 95% confidence intervals (CIs), using no AKI as the reference group.
