# Supplementary material
Source: Research Square preprint supplement (doi:10.21203/rs.3.rs-9228608/v1)
Supplement: Supplementary file 2 [file b361adfa0c1747bd0eee26aa.docx]

Supplementary Table 4. Interaction Analyses Assessing Effect Modification of AKI Severity on In-Hospital Mortality

| **Interaction Term** | **Estimate (β)** | **Standard Error** | **P for interaction** | **Interpretation** |
| --- | --- | --- | --- | --- |
| **AKI × CKD** |  |  |  |  |
| AKI (non-D) × CKD | −1.20 | 0.084 | <0.001 | AKI effect attenuated in CKD |
| AKI-D × CKD | −1.77 | 0.133 | <0.001 | Stronger attenuation in AKI-D |
| **AKI × Age Group (≥65 vs <65)** |  |  |  |  |
| AKI (non-D) × ≥65 | −0.58 | 0.073 | <0.001 | Weaker AKI effect in older patients |
| AKI-D × ≥65 | −0.77 | 0.127 | <0.001 | Greater attenuation in AKI-D |

Supplementary Table 4 evaluates effect modification of the association between AKI severity and in-hospital mortality across key clinical subgroups, including chronic kidney disease (CKD) status and age group. Survey-weighted multivariable logistic regression models including interaction terms between AKI severity and CKD and age group (≥65 vs <65 years) were used. Estimates are presented as regression coefficients (β) with standard errors. Negative interaction coefficients indicate attenuation of the association between AKI and mortality in the specified subgroup.
