# Supplementary material
Source: Research Square preprint supplement (doi:10.21203/rs.3.rs-9228608/v1)
Supplement: Supplementary file 3 [file f12432cb887ad28634c98d8e.docx]

Supplementary Table 3. Sensitivity Analyses Assessing the Robustness of the Association Between AKI Severity and In-Hospital Mortality

| **Model** | **AKI non-D OR (95% CI)** | **AKI-D OR (95% CI)** |
| --- | --- | --- |
| Main model | 4.34 (3.99-4.72) | 16.4 (14.2-18.9) |
| Excluding comorbidities | 4.30 (3.97–4.65) | 16.2 (14.2–18.5) |
| Excluding CKD | 6.14 (5.59–6.73) | 35.6 (29.9–42.4) |
| Without ED variable | 4.79 (4.40-5.21) | 20.8 (18.1-24.0) |
| non-elective admission only | 4.97 (4.51-5.36) | 21.9 (19.0-25.3) |
| Combined admission variable | 4.79 (4.40-5.21) | 20.8 (18.1-24.0) |
| Excluding sepsis | 4.52 (4.13-4.95) | 19.5 (16.8-22.7) |
| Primary cirrhosis diagnosis | 7.97 (6.84-9.30) | 35.5 (28.3-44.6) |

Supplementary Table 3 evaluates whether the association between AKI severity and in-hospital mortality remains consistent across alternative model specifications and cohort restrictions. Sensitivity analyses included exclusion of comorbidities, restriction to hospitalizations without chronic kidney disease (CKD), exclusion of admission characteristics, restriction to non-elective admissions, alternative specification of admission variables, exclusion of hospitalizations with sepsis, and restriction to hospitalizations with cirrhosis as the primary diagnosis.
