# Supplementary material
Source: Research Square preprint supplement (doi:10.21203/rs.3.rs-9228608/v1)
Supplement: Supplementary file 4 [file f9f435a2104acaa153f39088.docx]

Supplementary Table 1. ICD-10-CM codes and variables used to define study cohort, exposures, outcomes, and covariates

| 1. Study population definition | | |
| --- | --- | --- |
| **Variable** | **Definition** | **ICD-10-CM Codes / Source** |
| Cirrhosis | Hospitalizations with cirrhosis | K703, K746, K745 |
| Adult population | Age ≥18 years | HCUP variable: AGE |
|  |  |  |
| 1. Exposure variables |  |  |
| **Variable** | **Definition** | **ICD-10-CM Codes** |
| Acute kidney injury (AKI) | Presence of AKI | N17 (all subtypes) |
| AKI requiring dialysis (AKI-D) | AKI with dialysis procedure | ICD-10-PCS: 5A1D |
|  |  |  |
| 1. Outcome variables | | |
| **Variable** | **Definition** | **Source** |
| In-hospital mortality | Death during hospitalization | HCUP variable: Died |
| Length of stay | Hospital LOS (days) | HCUP variable: LOS |
| Hospital cost | Charges converted using CCR | TOTCHG_2023 x CCR |
|  |  |  |
| 1. Cirrhosis-related complications | | |
| **Variable** | **Definition** | **ICD-10-CM Codes** |
| Ascites | Presence of ascites | R18 |
| Hepatic encephalopathy | Liver failure / encephalopathy | K72, G93 |
| Varices | Esophageal varices | I85 |
|  |  |  |
| 1. Comorbidities | | |
| **Variable** | **Definition** | **ICD-10-CM Codes** |
| Diabetes mellitus | Type 1, 2, or other diabetes | E10, E11, E13 |
| Congestive heart failure | Heart failure | I50 |
| Hypertension | Essential hypertension | I10 |
| Chronic kidney disease | CKD stages | N18 |
|  |  |  |
| 1. Key covariates (HCUP variable) | | |
| **Variable** | **Description** |  |
| AGE | Age in years |  |
| FEMALE | Sex |  |
| PAY1 | Primary payer |  |
| ZIPINC_QRTL | Median household income quartile |  |
| ELECTIVE | Elective vs non-elective admission |  |
| HCUP_ED | Emergency department admission |  |
| HOSP_NIS | Hospital identifier |  |
| NIS_STRATUM | Stratification variable |  |
| DISCWT | Discharge weight |  |
|  |  |  |
| 1. Sensitivity analysis variables | | |
| **Variable** | **Definition** | **ICD-10-CM codes** |
| Sepsis | Systemic infection | A40, A41 |
| Non-elective admission | Derived from elective variable | ELECTIVE = 0 |

| Supplementary Table 1 lists the ICD-10-CM and ICD-10-PCS codes used to identify cirrhosis, acute kidney injury, comorbidities, and cirrhosis-related complications. Administrative variables from the HCUP Nationwide Inpatient Sample were used to define demographic, socioeconomic, and hospital characteristics. |
| --- |
